# Supplementary material for: Preparation of an Fe2Ni MOF on nickel foam as an efficient and stable electrocatalyst for the oxygen evolution reaction
Source: Royal Society of Chemistry journal article supplement (doi:10.1039/c9ra07499f), 2019-01-01
Supplement: c9ra07499f1.pdf [file c9ra07499f1.pdf]

## Supporting Information

### Preparation of Fe<sub>2</sub>Ni MOF on nickel foam as an efficient and stable electrocatalyst for the oxygen evolution reaction

Xintong Ling,<sup>†, [a, c]</sup> Feng Du,<sup>†, [a, c]</sup> Yintong Zhang,<sup>[a, c]</sup> Yan Shen,<sup>[c, e]</sup> Tao Li,<sup>\* [b]</sup> Ahmed Alsaedi,<sup>[f]</sup> Tasawar Hayat,<sup>[f, g]</sup> Yong Zhou,<sup>\* [a, c, d]</sup> and Zhigang Zou<sup>[a, c, d]</sup>

[a] School of Physics, National Laboratory of Solid State Microstructures, Nanjing University, Nanjing, Jiangsu 210093, P. R. China

[b] Engineering Technology Research Center of Henan Province for Solar Catalysis, School of Chemistry and Pharmaceutical Engineering, Nanyang Normal University, Nanyang, Henan 473061, P. R. China

[c] Jiangsu Key Laboratory for Nano Technology, Nanjing University, Nanjing, Jiangsu 210093, P. R. China

[d] Kunshan Innovation Institute of Nanjing University, Kunshan, Jiangsu 215347, P. R. China

[e] College of Engineering and Applied Sciences, Nanjing University, Nanjing 210093, P. R. China

[f] Faculty of Science, King Abdulaziz University, Jeddah 21589, Saudi Arabia

[g] Department of Mathematics, Quaid-I-Azam University, Islamabad 45320, Pakistan

† Ling and Du contributed equally to this work

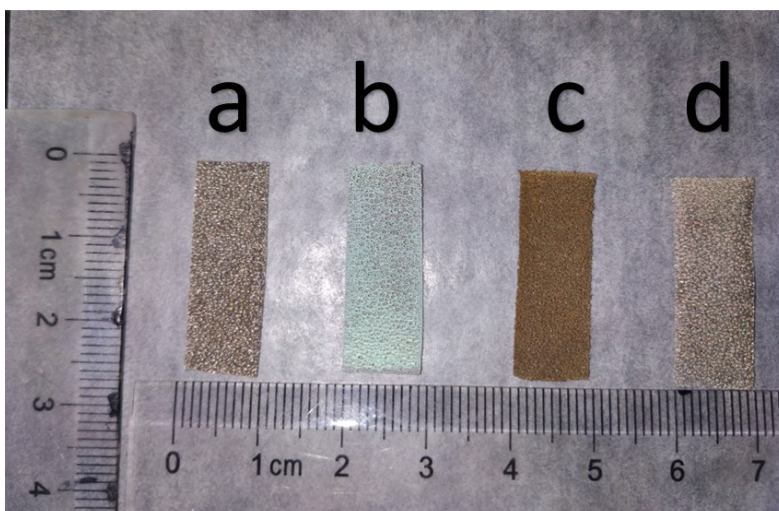

**Fig. S1** Photos of nickel foams: (a) blank NF, (b) Ni MOF/NF, (c) Fe<sub>2</sub>Ni MOF/NF and (d) Fe MOF/NF.

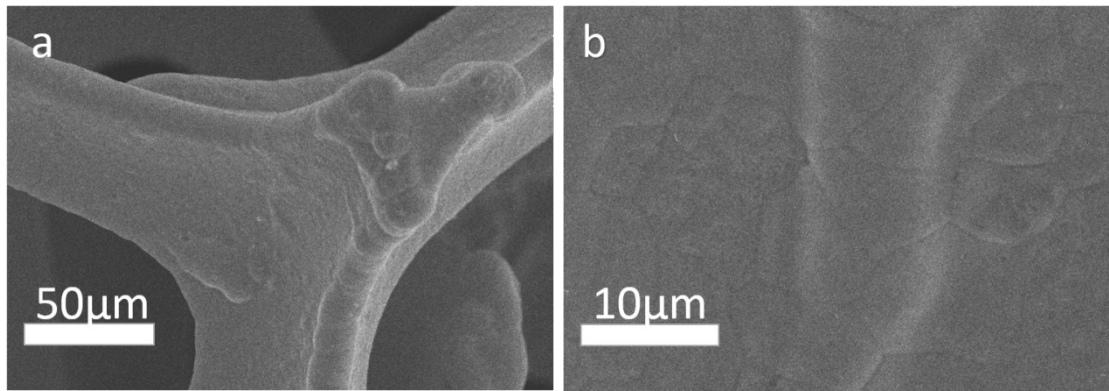

**Fig. S2** SEM images of Ni foam(a,b).

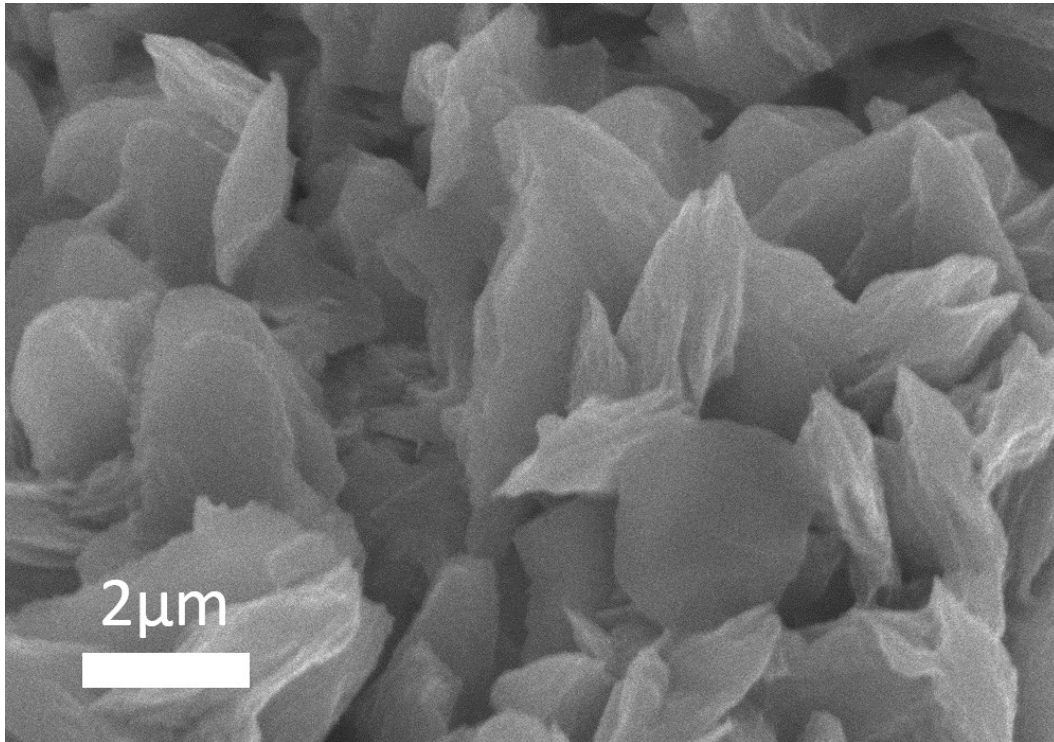

**Fig. S3** SEM image of Fe<sub>2</sub>Ni MOF/NF after stability test.

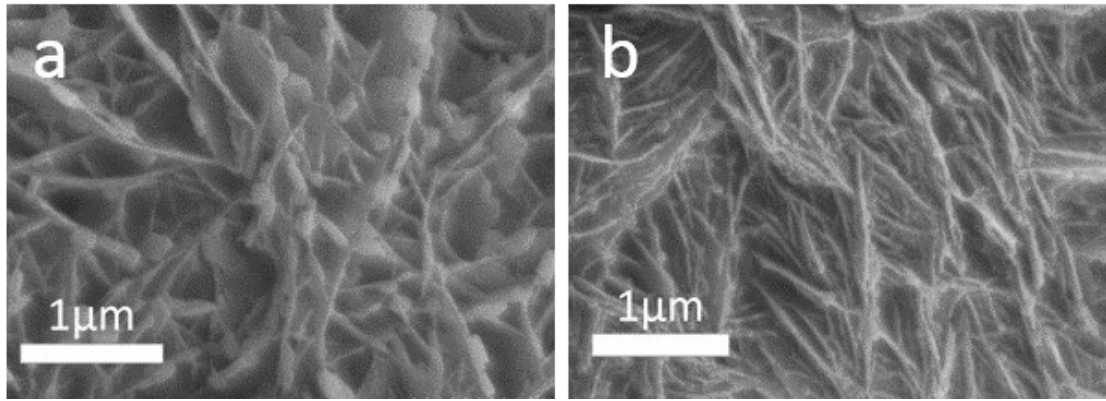

**Fig. S4** (a) SEM images of Fe:Ni=3:7 and (b) Fe:Ni=5:5.

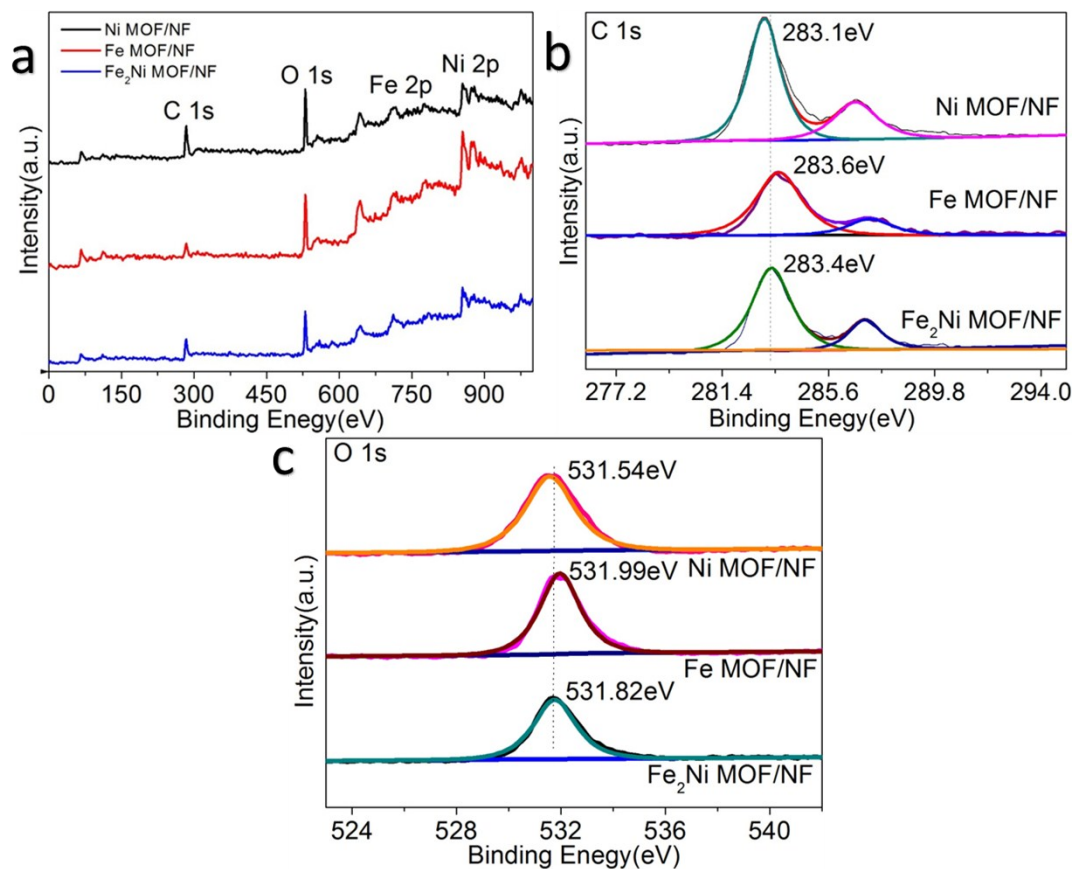

**Fig. S5** (a) Fully measured XPS spectra of Fe<sub>2</sub>Ni MOF/NF, Ni MOF/NF and Fe MOF/NF, High-resolution XPS spectra of (b) C 1s and (c) O 1s of the as-prepared samples.

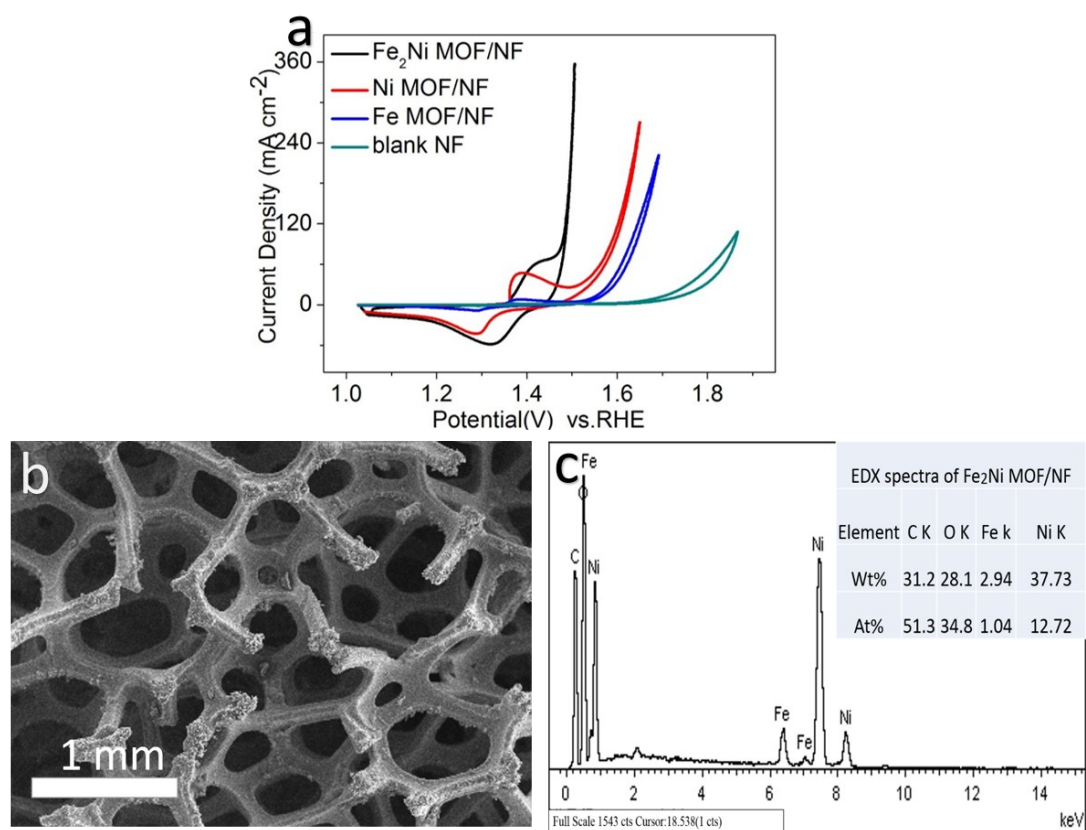

**Fig. S6** (a) CV curves of  $\text{Fe}_2\text{Ni MOF/NF}$ , Ni MOF/NF, Fe MOF/NF and blank NF, (b) SEM images with corresponding (c) EDX results of  $\text{Fe}_2\text{Ni MOF/NF}$ , (Inset of c): table of elemental composition.

**Table S1** OER performances for blank NF, Fe MOF/NF, Ni MOF/NF and Fe<sub>2</sub>Ni MOF/NF.

| Catalysts                 | $\eta$ (at 10 mA cm <sup>2</sup> ) | Tafel slope                |
|---------------------------|------------------------------------|----------------------------|
| blank NF                  | 494 mV                             | 206.4 mV dec <sup>-1</sup> |
| Fe MOF/NF                 | 327 mV                             | 134.4 mV dec <sup>-1</sup> |
| Ni MOF/NF                 | 268 mV                             | 132.5 mV dec <sup>-1</sup> |
| Fe <sub>2</sub> Ni MOF/NF | 222 mV                             | 42.4 mV dec <sup>-1</sup>  |



**Table S2** OER performances for Fe:Ni=3:7, Fe:Ni=5:5 and Fe:Ni=7:3.

| Catalysts | $\eta$ (at 10 mA cm <sup>2</sup> ) | Tafel slope               |
|-----------|------------------------------------|---------------------------|
| Fe:Ni=3:7 | 236 mV                             | 51.4 mV dec <sup>-1</sup> |
| Fe:Ni=5:5 | 231 mV                             | 50.3 mV dec <sup>-1</sup> |
| Fe:Ni=7:3 | 222 mV                             | 42.4 mV dec <sup>-1</sup> |

**Table S3** Comparison of OER performance in alkaline media with other reported non-precious electrocatalysts.

| Catalysts                                                                       | $\eta$ (mV @ mA cm <sup>-2</sup> ) | Tafel slope (mV dec <sup>-1</sup> ) | Ref                                               |
|---------------------------------------------------------------------------------|------------------------------------|-------------------------------------|---------------------------------------------------|
| Fe <sub>2</sub> Ni MOF/NF                                                       | 222@10                             | 42.4                                | This work                                         |
| MNF-MOFs/NF                                                                     | 235@50                             | 55.4                                | Nano Energy. 2019, 57 1–13.                       |
| Fe <sub>0.1</sub> -Ni-MOF/NF                                                    | 243@50                             | 69.8                                | J. Mater. Chem. A. 2019, 7, 8771.                 |
| NFN-MOF/NF                                                                      | 240@10                             | 58.8                                | Adv. Energy Mater. 2018, 8, 1801065.              |
| Fe-MOF/NF                                                                       | 240@50                             | 72                                  | Inorg. Chem. Front. 2018,51, 405.                 |
| Ni-MOF/NF                                                                       | 320@100                            | 123                                 | Inorg. Chem. Front. 2018, 5, 1570.                |
| FeNi-DOBDC                                                                      | 270@50                             | 34                                  | ACS Sustainable Chem. Eng. 2019, 7, 9743–9749     |
| NiFe-MOF-74                                                                     | 223@10                             | 71.6                                | Chem. Commun., 2018, 54, 7046—7049                |
| NiFe-NFF                                                                        | 227@10                             | 38.9                                | Adv. Funct. Mater. 2019, 29, 1807418              |
| Co <sub>3</sub> S <sub>4</sub> /EC-MOF                                          | 226@10                             | 132                                 | Adv. Mater. 2019, 31, 1806672                     |
| Ni <sub>x</sub> Co <sub>3-x</sub> O <sub>4</sub> /NF                            | 287@10                             | 88                                  | Nanoscale, 2019,11, 11765-11773                   |
| FeNi-MOF                                                                        | 270@50                             | 49                                  | ACS Sustainable Chem. Eng. 2019, 7, 9743–9749     |
| (Ni <sub>2</sub> Co <sub>1</sub> ) <sub>0.925</sub> Fe <sub>0.075</sub> -MOF-NF | 257@10                             | 41.3                                | Adv. Mater. 2019, 31, 1901139                     |
| Ni-Fe-MOF NSs                                                                   | 221@10                             | 56.0                                | Angew. Chem. Int. Ed. 2019, 58, 7051 – 7056       |
| CoNi-MOF/rGO                                                                    | 318@10                             | 48                                  | ACS Appl. Mater. Interfaces 2019, 11, 15662–15669 |
| EC-MOF                                                                          | 215@20                             | 37                                  | ACS Appl. Energy Mater. 2019, 2, 2138–2148        |
| (Co,Ni)Se <sub>2</sub> @NiFe LDH                                                | 277@10                             | 75                                  | ACS Appl. Mater. Interfaces 2019, 11, 8106–8114   |
